# Supplementary material
Source: PubMed Central journal article supplement (PMC4007107)
Supplement: supp_kft334_kft334-Supp.pdf [file supp_kft334_kft334-Supp.pdf]

**PCB 136 Enantiospecifically Alters Neuronal Connectivity in Cultured Rat Hippocampal  
Neurons via Ryanodine Receptor-Dependent Mechanisms**

**Supplementary data**

Dongren Yang<sup>\*</sup>, Izabela Kania-Korwel<sup>†</sup>, Diptiman Bose<sup>\*</sup>, Atefeh Ghogha<sup>\*</sup>, Isaac N. Pessah<sup>\*</sup>,  
Hans-Joachim Lehmler<sup>†</sup>, Pamela J. Lein<sup>\*‡</sup>

<sup>\*</sup>Department of Molecular Biosciences, School of Veterinary Medicine, University of California, Davis, CA, 95616 ([mryang@ucdavis.edu](mailto:mryang@ucdavis.edu); [diptiman.bose@wne.edu](mailto:diptiman.bose@wne.edu); [aghogha@ucdavis.edu](mailto:aghogha@ucdavis.edu); [inpessah@ucdavis.edu](mailto:inpessah@ucdavis.edu); [pjlein@ucdavis.edu](mailto:pjlein@ucdavis.edu)); <sup>†</sup>Department of Occupational and Environmental Health, College of Public Health, University of Iowa, Iowa City, IA, 52242 ([izabela-korwel@uiowa.edu](mailto:izabela-korwel@uiowa.edu); [hans-joachim-lehmler@uiowa.edu](mailto:hans-joachim-lehmler@uiowa.edu))

<sup>‡</sup>Corresponding author: Pamela J. Lein  
Department of Molecular Biosciences  
UC Davis School of Veterinary Medicine  
2009 VM3B, 1089 Veterinary Medicine Drive  
Davis, CA 95616  
Telephone: 530-752-1970  
Fax: 530-752-7690  
Email: [pjlein@ucdavis.edu](mailto:pjlein@ucdavis.edu)

**Short title:** PCB 136 enantiospecific neurotoxicity

**Table S1:** Summary of capillary columns, temperature programs and other instrument parameters used for the analysis of PCB 136 and its hydroxylated metabolites. All analyses were performed on an Agilent 6890N gas chromatograph equipped with a micro electron capture detector.

| Analysis                          | Capillary column, source                                                                                                                           | Temperature program                                                                  | Injector temperature [°C] | Detector temperature [°C] | Carrier gas flow rate [mL/min] |
|-----------------------------------|----------------------------------------------------------------------------------------------------------------------------------------------------|--------------------------------------------------------------------------------------|---------------------------|---------------------------|--------------------------------|
| PCB 136                           | DB1-MS column (100% dimethylpolysiloxane; 60 m × 0.25 mm i.d. × 0.25 µm film thickness), Agilent, Santa Clara, CA                                  | 80°C for 1 min, 10°C/min to 280°C, hold 15 min                                       | 280                       | 300                       | 1                              |
| Hydroxylated PCB metabolites      | DB1-MS column (100% dimethylpolysiloxane; 60 m × 0.25 mm i.d. × 0.25 µm film thickness), Agilent, Santa Clara, CA                                  | 100°C for 1 min, 5°C/min to 250°C, hold for 20 min, 5°C/min to 280°C, hold for 3 min | 280                       | 300                       | 1                              |
| Enantioselective PCB 136 analysis | Chirasil-Dex column (β-cyclodextrin chemically bonded to dimethylpolysiloxane; 25 m × 0.25 mm i.d. × 0.25 µm film thickness) Varian, Palo Alto, CA | 100°C, 2°C/min to 150°C, 0.2°C/min to 185°C, 15°C/min to 200°C, hold for 10 min      | 250                       | 250                       | 1                              |
